# Supplementary material for: Origin of fullerene-induced vitrification of fullerene:donor polymer photovoltaic blends and its impact on solar cell performance
Source: Royal Society of Chemistry journal article supplement (doi:10.1039/c6ta08950j), 2016-12-17
Supplement: c6ta08950j1.pdf [file c6ta08950j1.pdf]

## Supplementary Information

### Origin of fullerene-induced vitrification of fullerene:donor polymer photovoltaic blends and its impact on solar cell performance

Paul Westacott,<sup>1</sup> Neil D. Treat,<sup>1</sup> Jaime Martin,<sup>1</sup> James H. Bannock,<sup>2</sup> John C. de Mello,<sup>2</sup> Michael Chabinyc,<sup>3</sup> Alexander B. Sieval,<sup>4</sup> Jasper J. Michels<sup>5\*</sup> and Natalie Stingelin<sup>1\*</sup>

<sup>1</sup>Department of Materials and Centre for Plastic Electronics, Imperial College London, London, SW7 2AZ, UK

<sup>2</sup>Department of Chemistry and Centre for Plastic Electronics, Imperial College London, London, SW7 2AZ, UK

<sup>3</sup>Materials Research Laboratory, University of California Santa Barbara, CA 93106, USA

<sup>4</sup>Solenne BV, Zernikepark 6, 69747AN Groningen, The Netherlands

<sup>5</sup>Max Planck Institute for Polymer Research, Ackermannweg 10, 55128 Mainz

e-mail: [natalie.stingelin@imperial.ac.uk](mailto:natalie.stingelin@imperial.ac.uk) / [michels@mpip-mainz.mpg.de](mailto:michels@mpip-mainz.mpg.de)

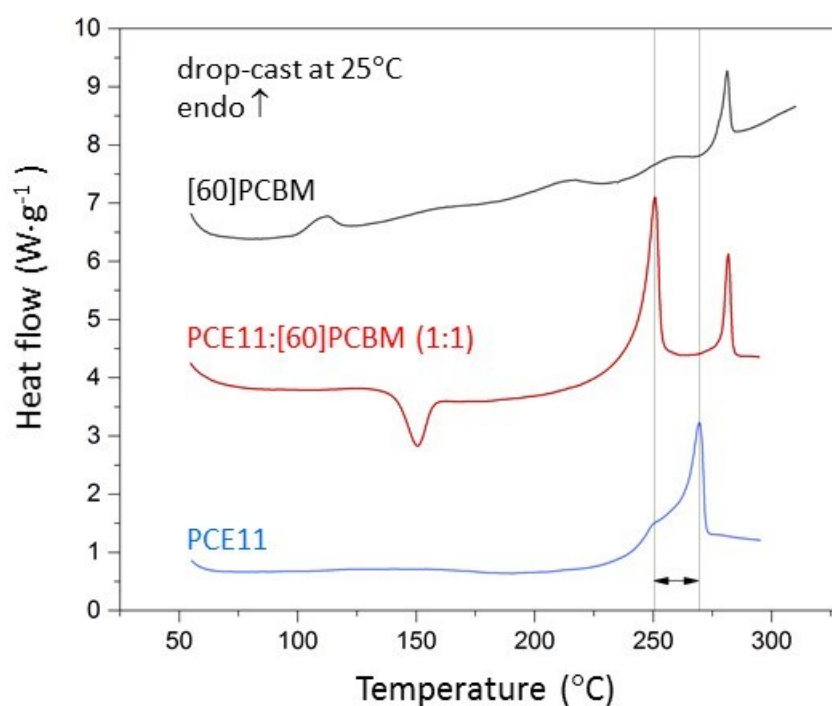

**Figure S1.** Thermal behaviour of PCE11 (i.e. PffBT4T-2OD), [60]PCBM and a 1:1 blend of them. Here, asystems were drop-cast at 25 °C. A noticeable cold crystallisation exotherm is observed for the binary also in this scenario, while such an exothermic feature is again missing in the neat components.
